# Supplementary material for: Automation of soil flux chamber measurements: potentials and pitfalls
Source: Copernicus journal article supplement (doi:10.5194/bg-13-1949-2016), 2016-03-30

Supplement of Biogeosciences, 13, 1949–1966, 2016  
<http://www.biogeosciences.net/13/1949/2016/>  
doi:10.5194/bg-13-1949-2016-supplement  
© Author(s) 2016. CC Attribution 3.0 License.

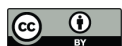

*Supplement of*

## **Automation of soil flux chamber measurements: potentials and pitfalls**

**Carolyn-Monika Görres et al.**

*Correspondence to:* Carolyn-Monika Görres ([carolyn.goerres@hs-gm.de](mailto:carolyn.goerres@hs-gm.de))

The copyright of individual parts of the supplement might differ from the CC-BY 3.0 licence.

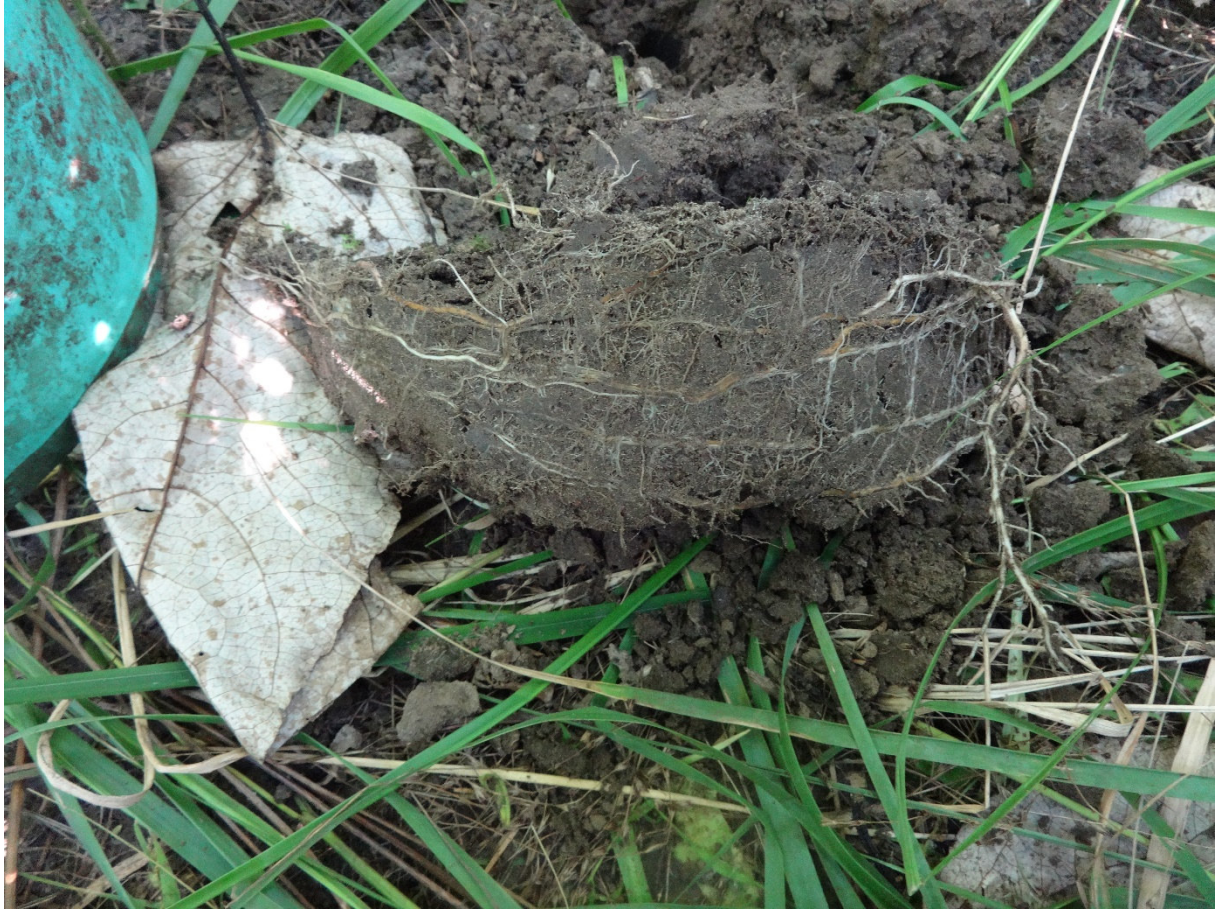

Figure S1. Newly developed root mat within a LI-8100A collar discovered after collar removal in August 2014.



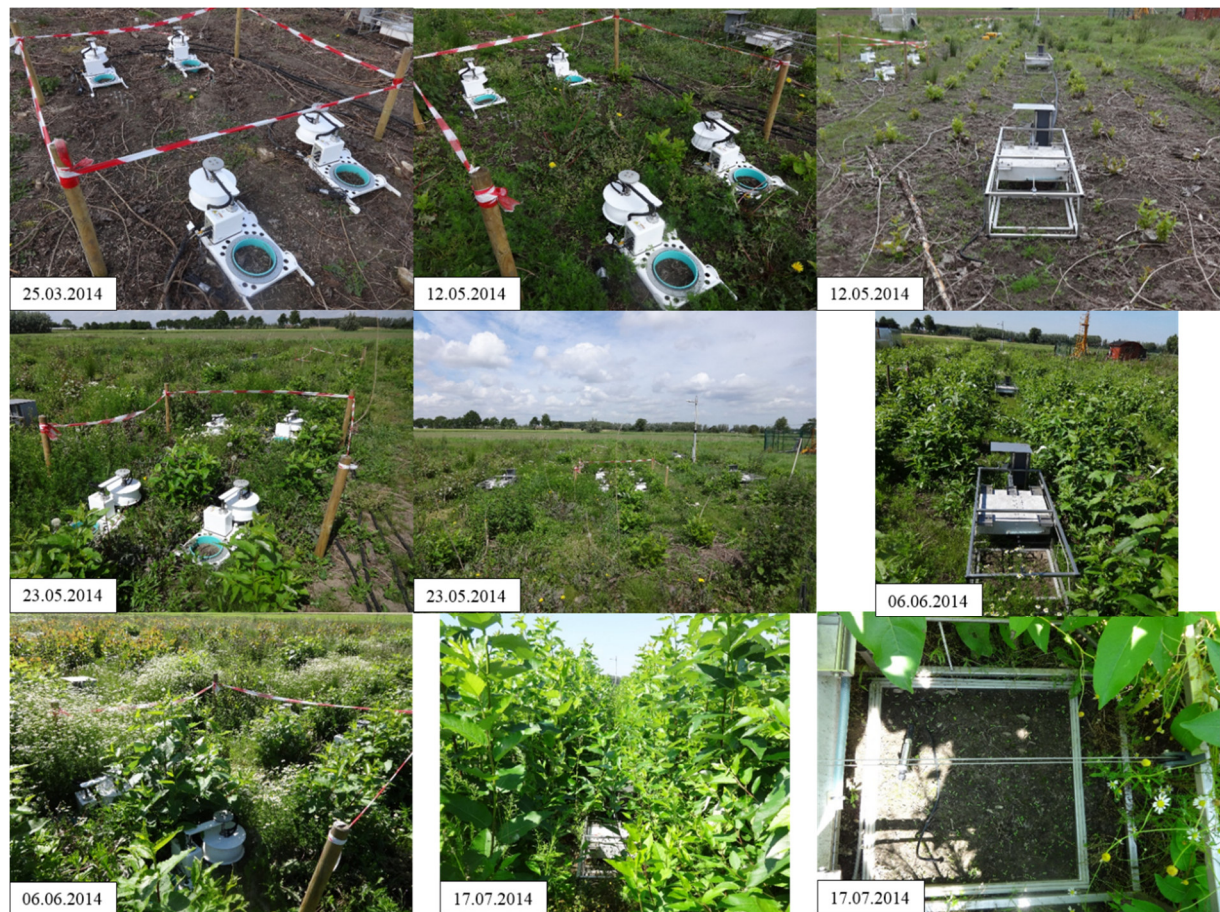

Figure S2. Regrowth of the vegetation at the poplar plantation after the harvest and subsequent increase in shading of the CO<sub>2</sub> flux measurement plots.

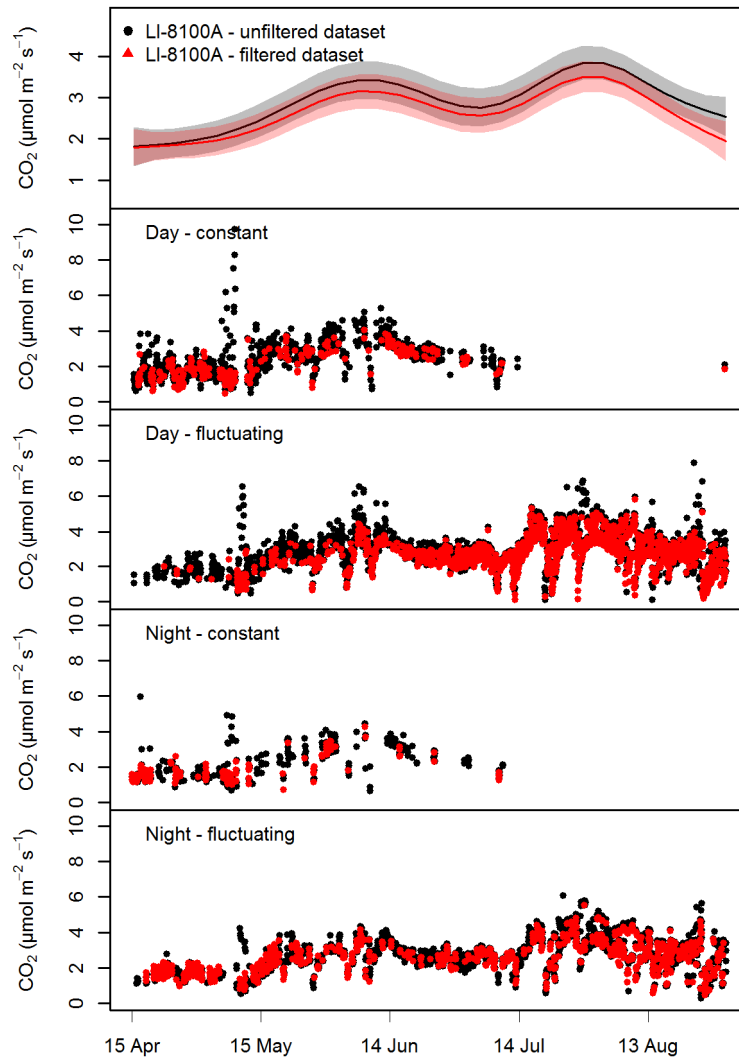

Figure S3. LI-8100A CO<sub>2</sub> flux datasets for the entire monitoring period (narrow rows only). The top panel shows the average daily CO<sub>2</sub> flux and its respective 95 % confidence interval estimated using generalized additive models (GAM) (deviance explained: unfiltered dataset 65.1 % (n=556), filtered dataset 65.6 % (n=545)). In the other panels, the single measured CO<sub>2</sub> fluxes over time were grouped by time of the day and stability of the atmospheric CO<sub>2</sub> concentration at 50 cm above the soil surface. The datasets were divided into day and night based on sun rise and sunset times. Atmospheric CO<sub>2</sub> concentration was considered as constant when the standard deviation for a 3 min measurement prior to the chamber closures was  $\leq 1.0$  ppm.

Figure S4. Plots of fitted values versus residuals and Q-Q plots for the single model fits of the Lloyd and Taylor model (all = entire flux dataset, open = only measurements made during the open canopy phase, closed = only measurements made during the closed canopy phase, unfil = flux dataset not filtered, fil = filtered flux dataset, narrow = narrow row, wide = wide row; for more details please refer to the associated article).

**Licor all – unfil – narrow**

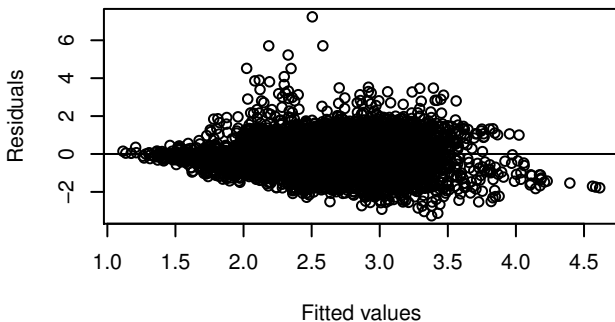

**Licor all – fil – narrow**

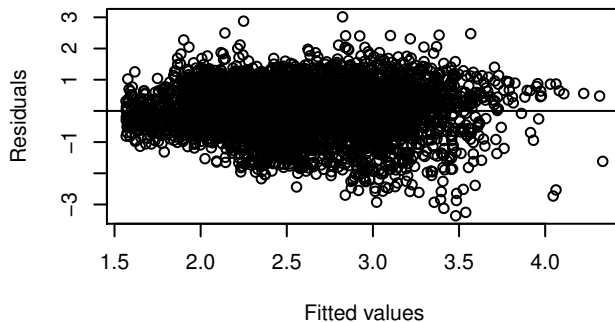

**Licor all – unfil – wide**

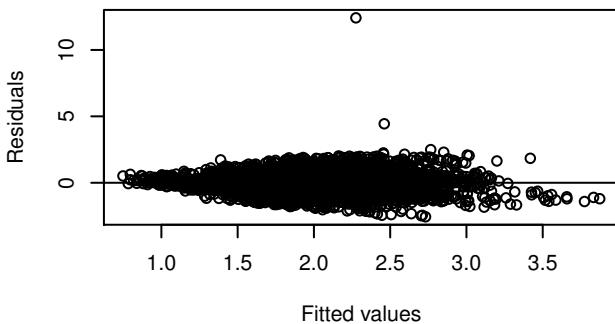

**Licor all – fil – wide**

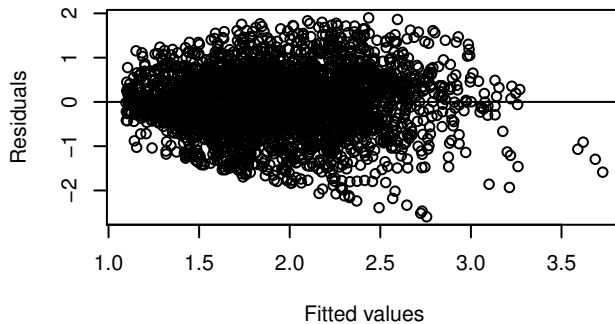

**AGPS all – unfil**

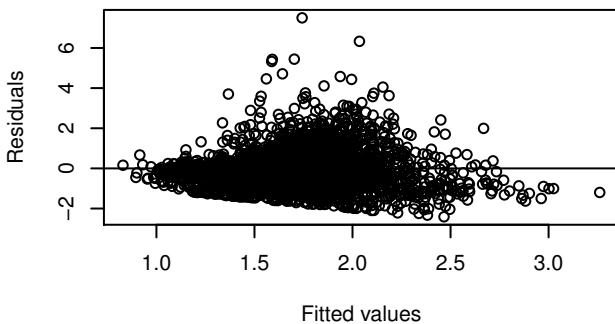

**AGPS all – fil**

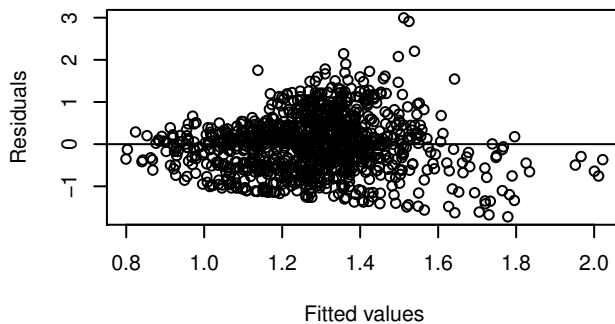

**Licor all – unfil – narrow**

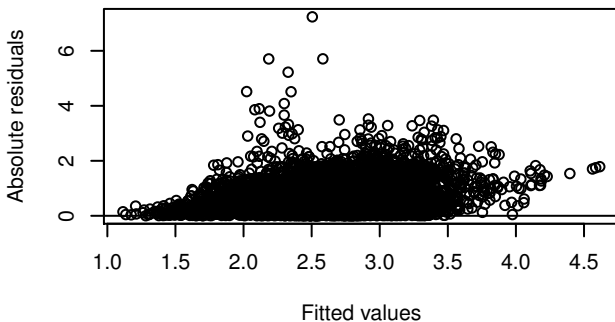

**Licor all – fil – narrow**

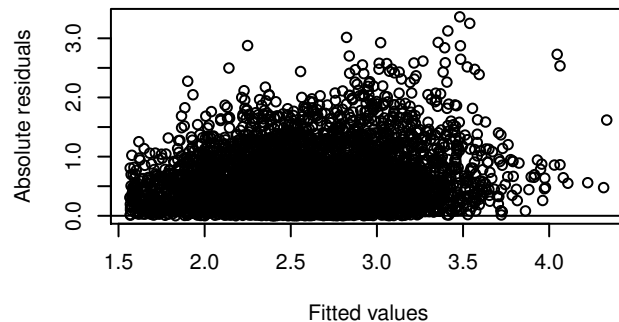

**Licor all – unfil – wide**

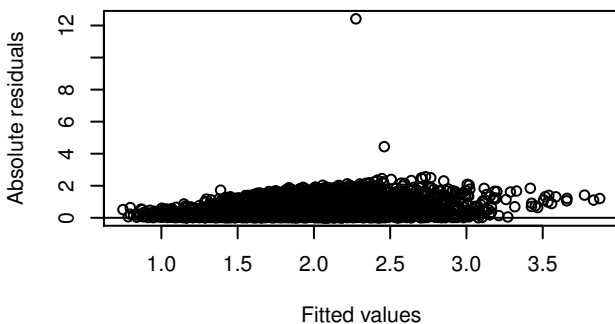

**Licor all – fil – wide**

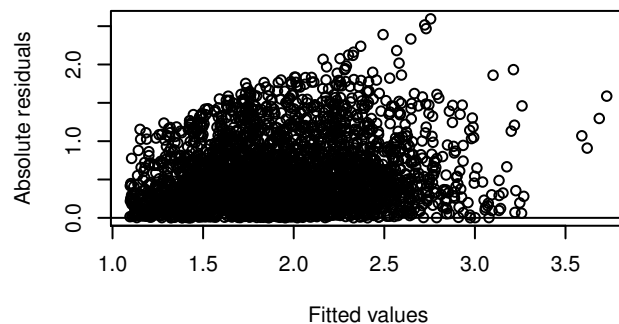

**AGPS all – unfil**

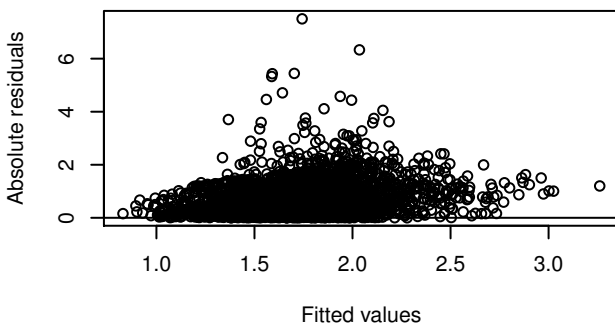

**AGPS all – fil**

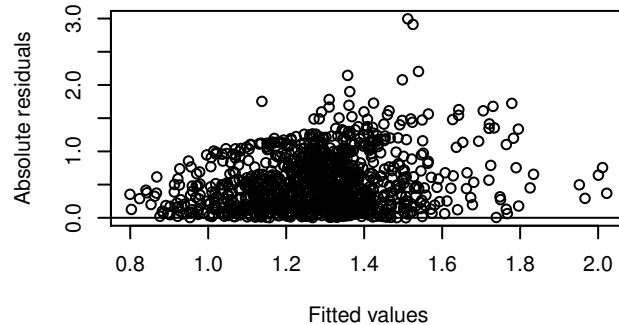

**Licor all – unfil – narrow**

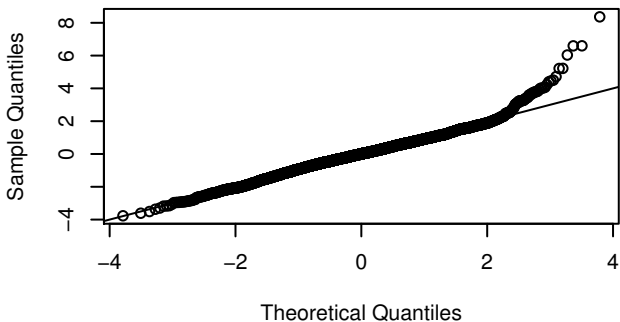

**Licor all – fil – narrow**

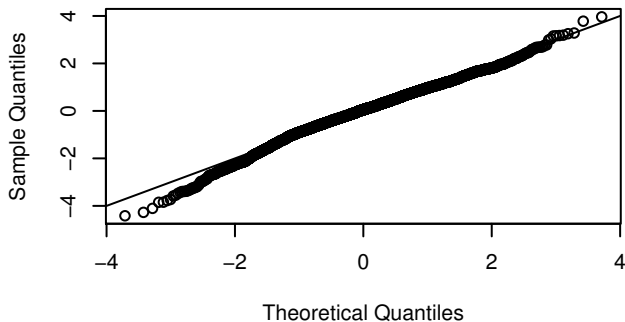

**Licor all – unfil – wide**

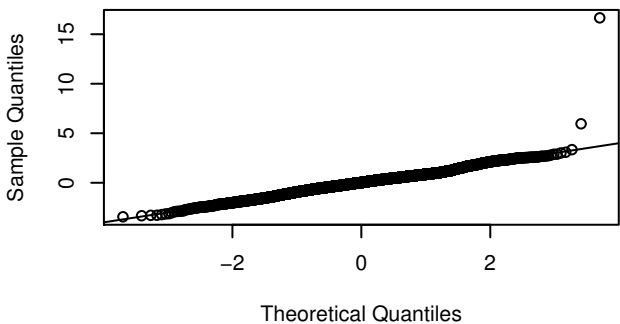

**Licor all – fil – wide**

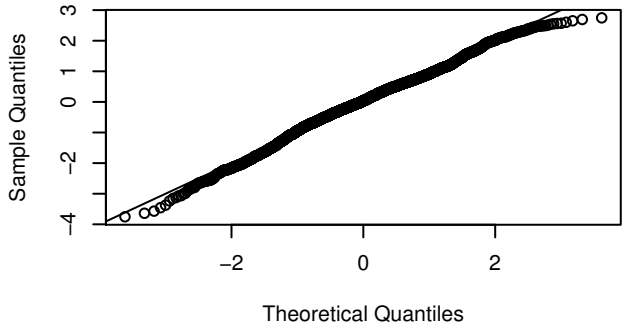

**AGPS all – unfil**

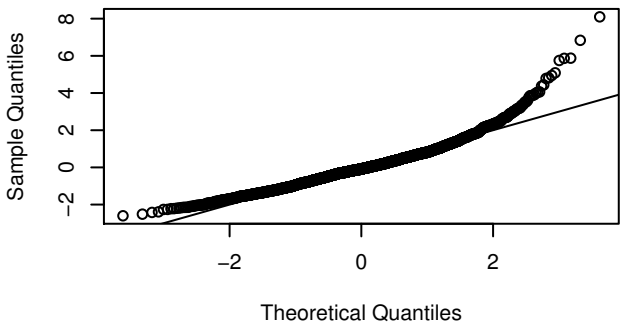

**AGPS all – fil**

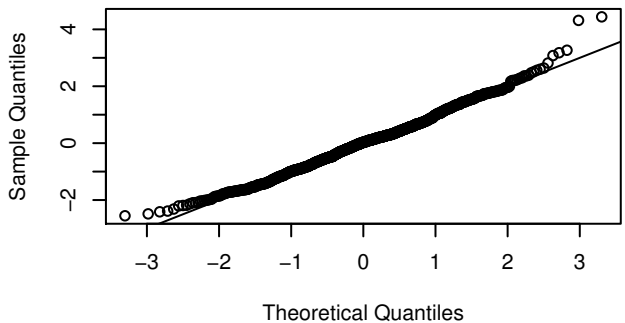



**Licor all – unfil – narrow**

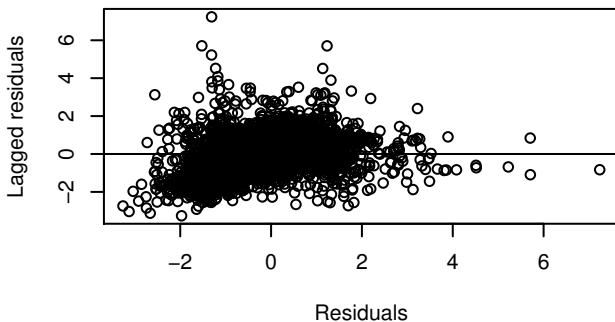

**Licor all – fil – narrow**

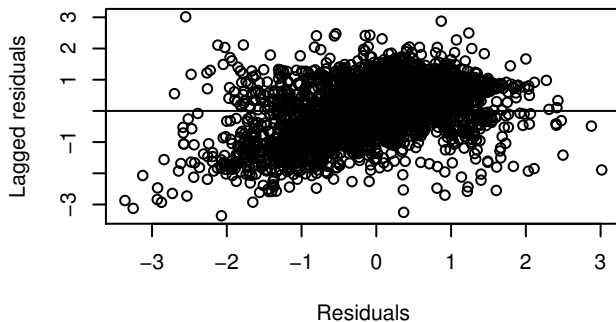

**Licor all – unfil – wide**

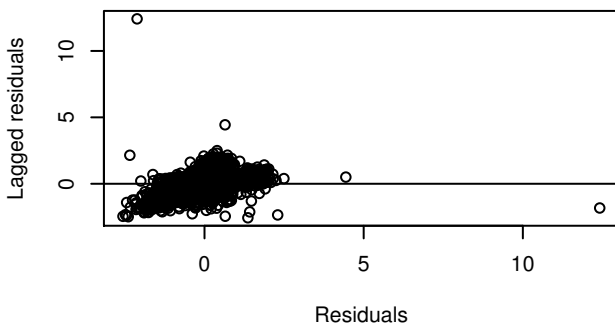

**Licor all – fil – wide**

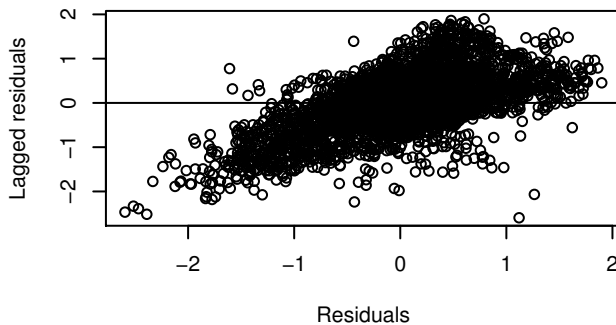

**AGPS all – unfil**

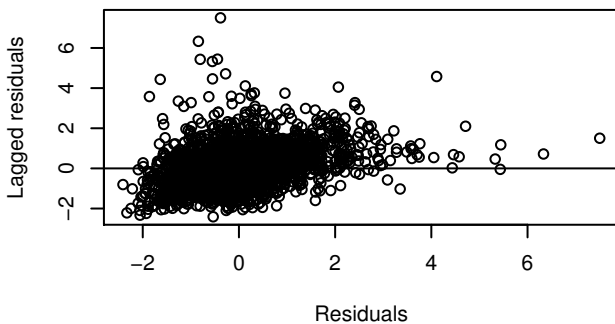

**AGPS all – fil**

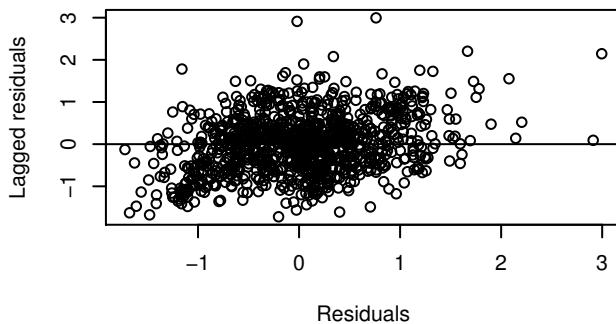

**Licor all – unfil open – narrow**

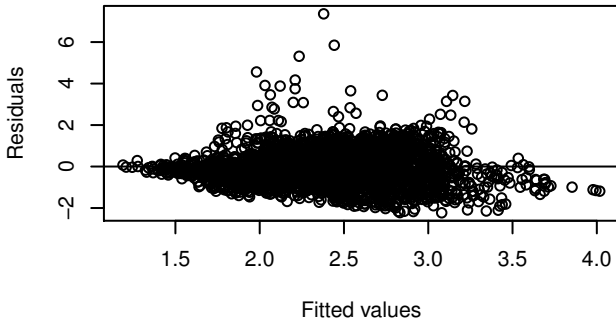

**Licor all – fil open – narrow**

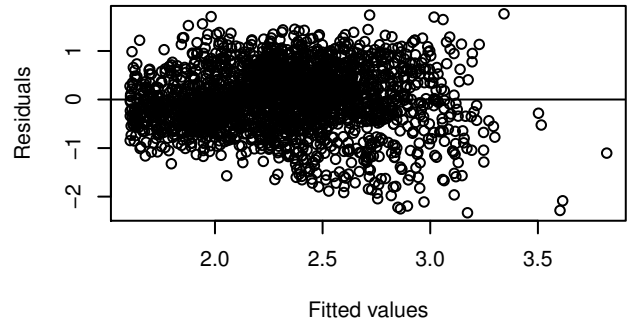

**Licor all – unfil open – wide**

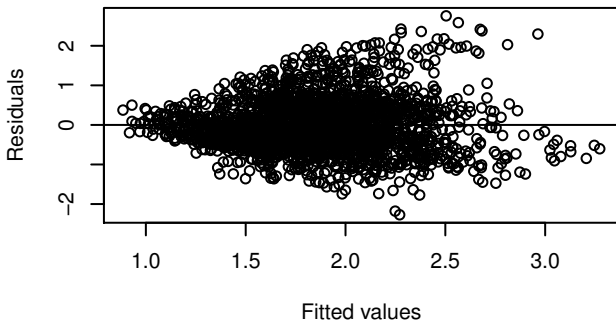

**Licor all – fil open – wide**

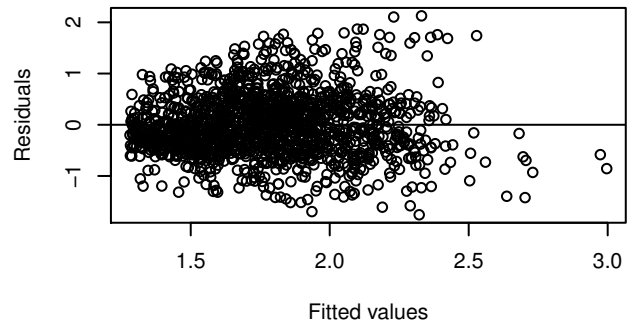

**AGPS all – unfil open**

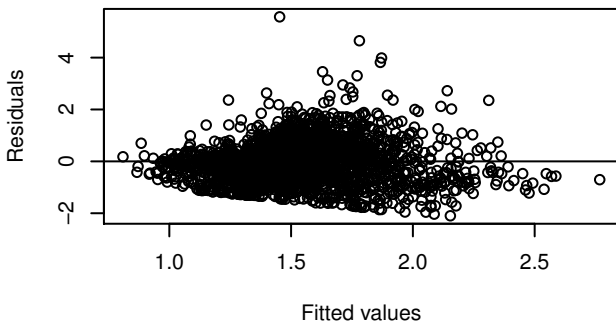

**AGPS all – fil open**

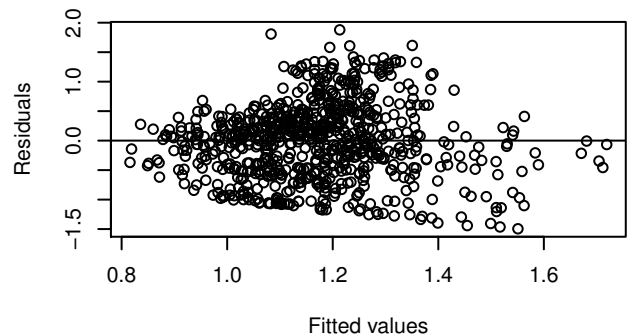

**Licor all – unfil open – narrow**

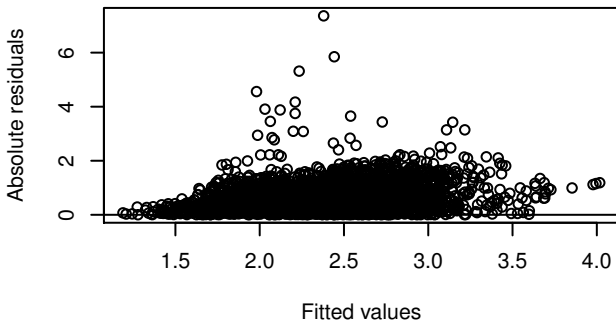

**Licor all – fil open – narrow**

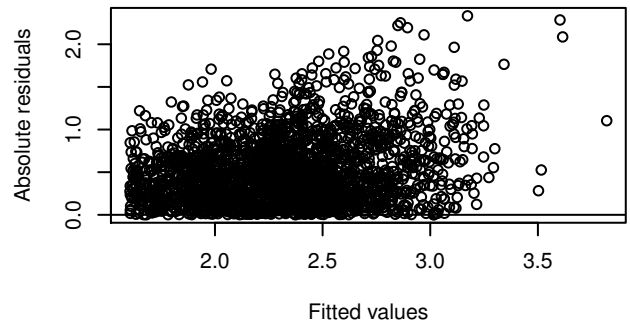

**Licor all – unfil open – wide**

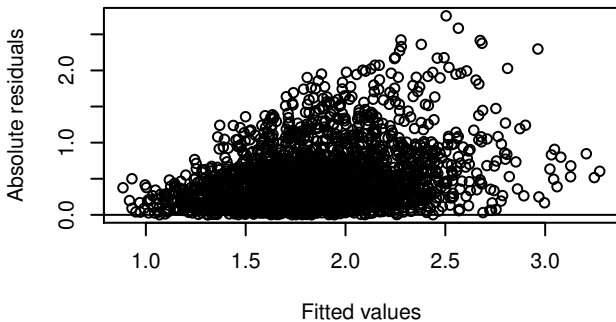

**Licor all – fil open – wide**

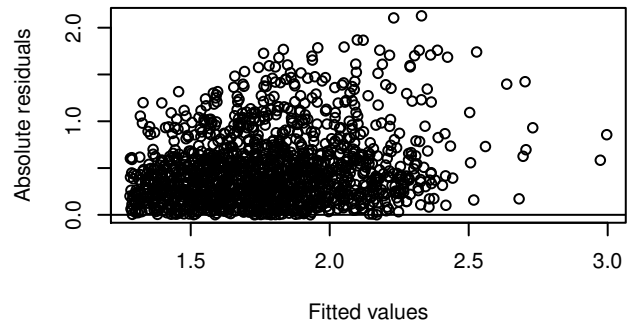

**AGPS all – unfil open**

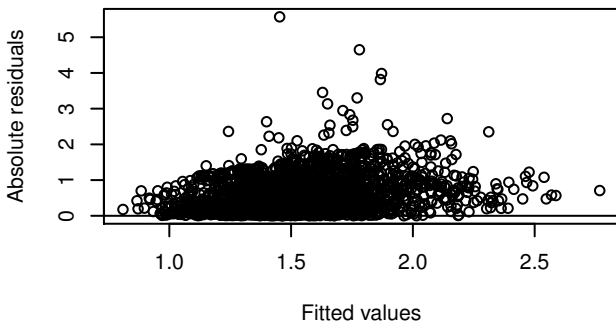

**AGPS all – fil open**

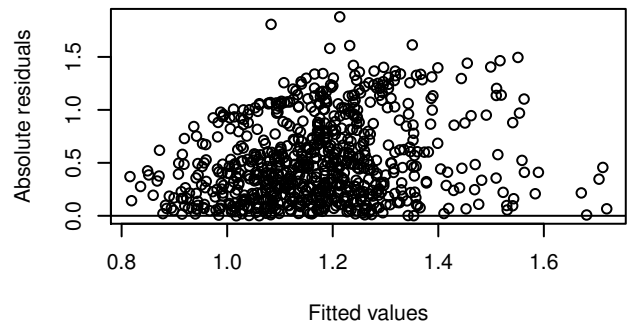

**Licor all – unfil open – narrow**

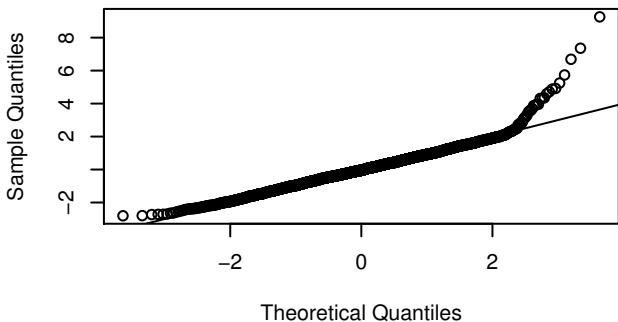

**Licor all – fil open – narrow**

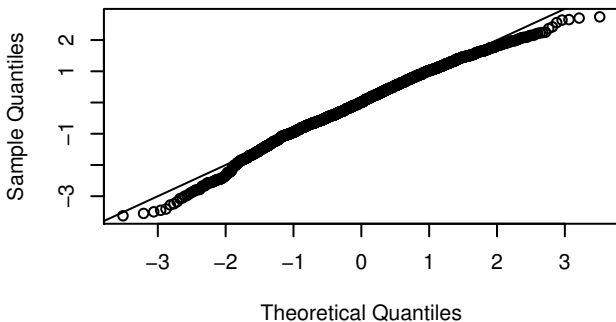

**Licor all – unfil open – wide**

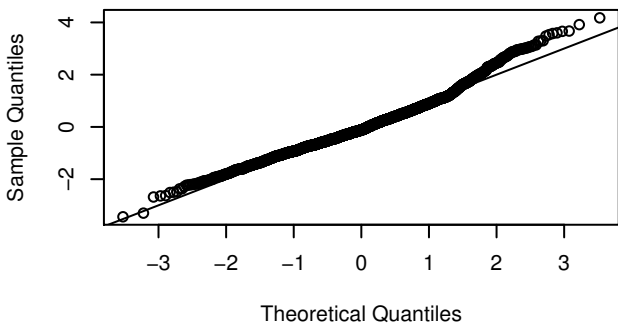

**Licor all – fil open – wide**

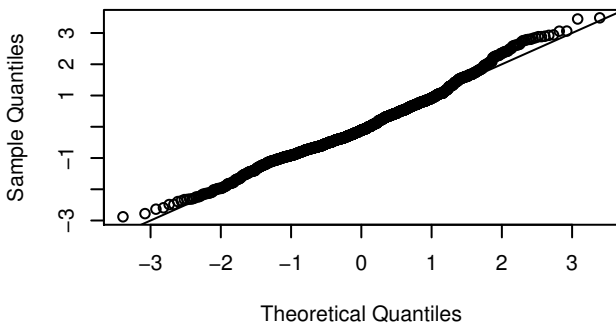

**AGPS all – unfil open**

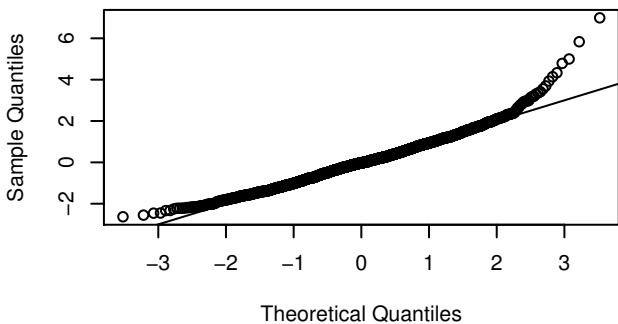

**AGPS all – fil open**

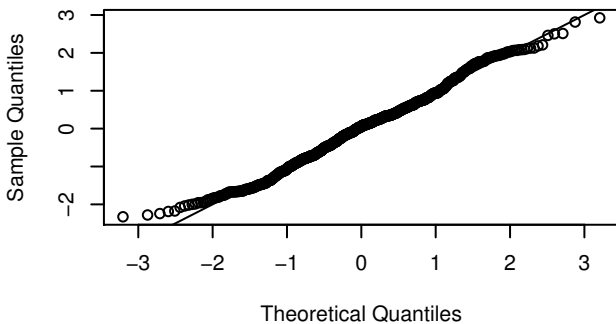

**Licor all – unfil open – narrow**

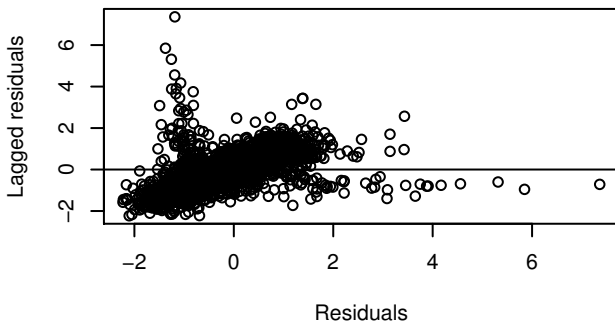

**Licor all – fil open – narrow**

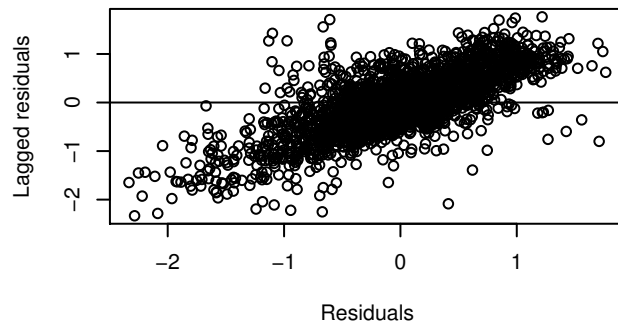

**Licor all – unfil open – wide**

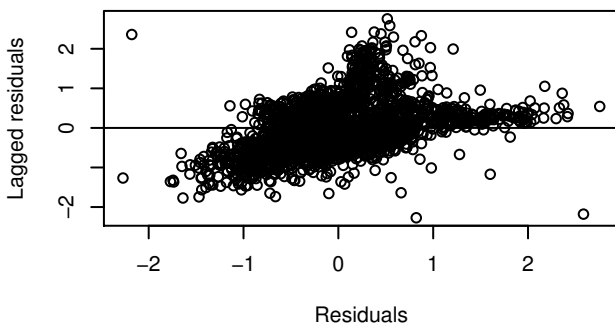

**Licor all – fil open – wide**

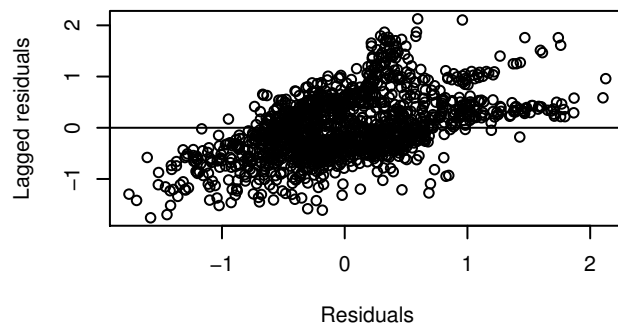

**AGPS all – unfil open**

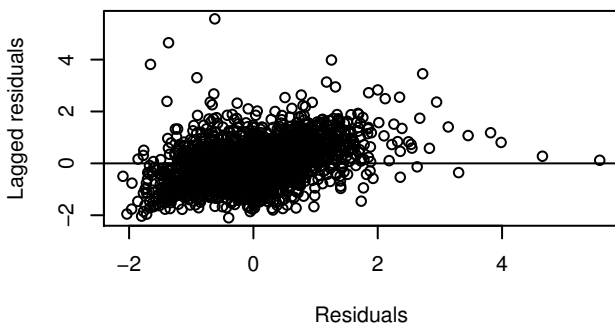

**AGPS all – fil open**

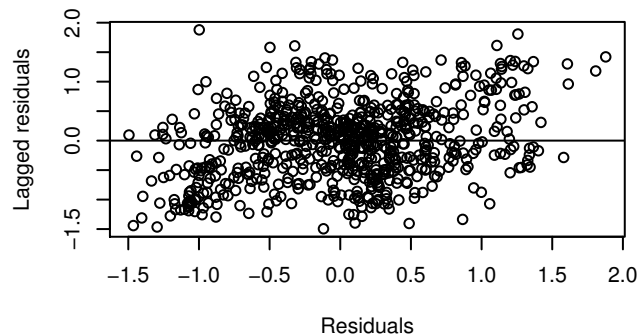

**Licor all – unfil closed – narrow**

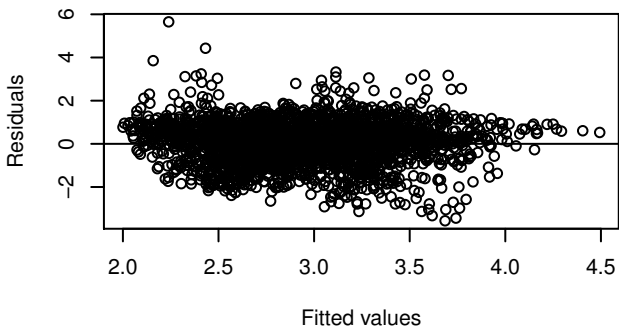

**Licor all – fil closed – narrow**

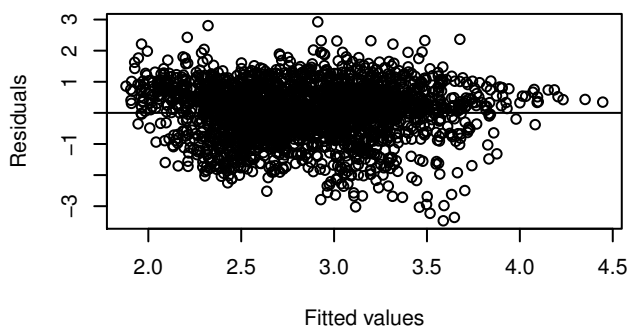

**Licor all – unfil closed – wide**

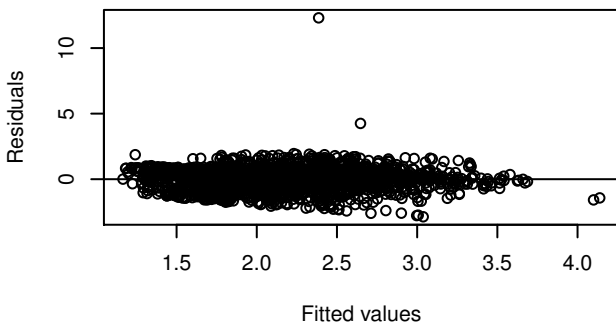

**Licor all – fil closed – wide**

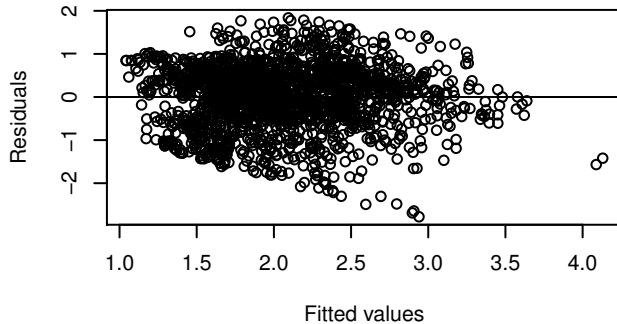

**AGPS all – unfil closed**

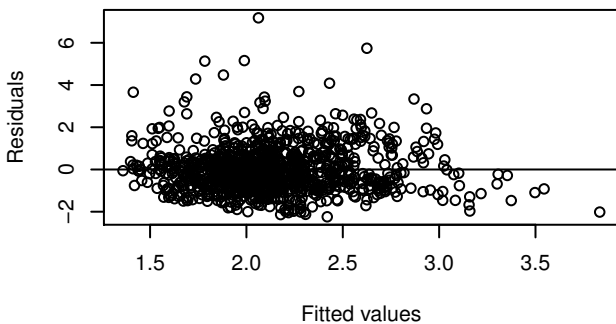

**AGPS all – fil closed**

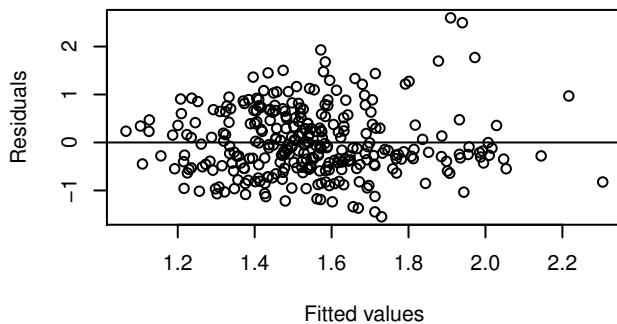



**Licor all – unfil closed – narrow**

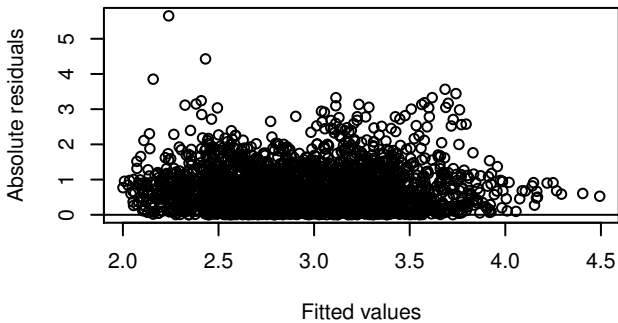

**Licor all – fil closed – narrow**

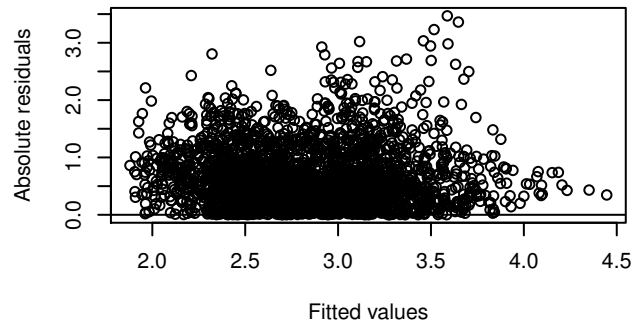

**Licor all – unfil closed – wide**

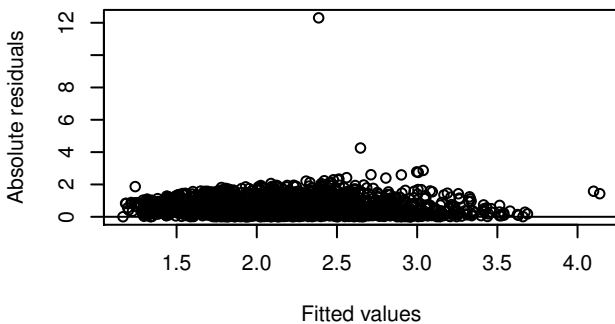

**Licor all – fil closed – wide**

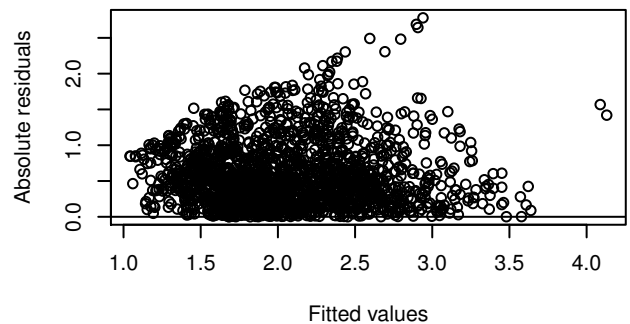

**AGPS all – unfil closed**

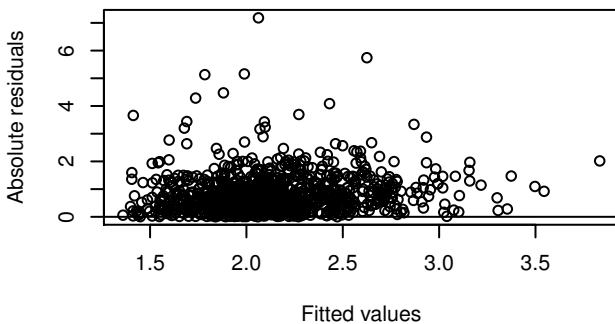

**AGPS all – fil closed**

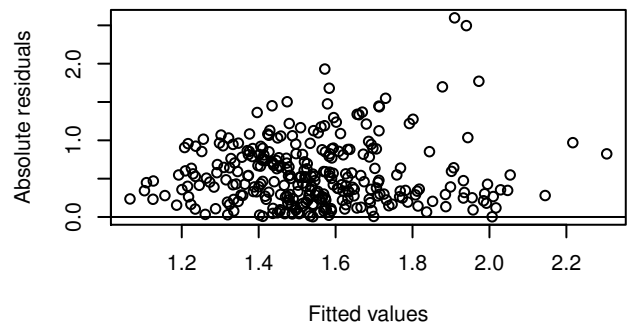

**Licor all – unfil closed – narrow**

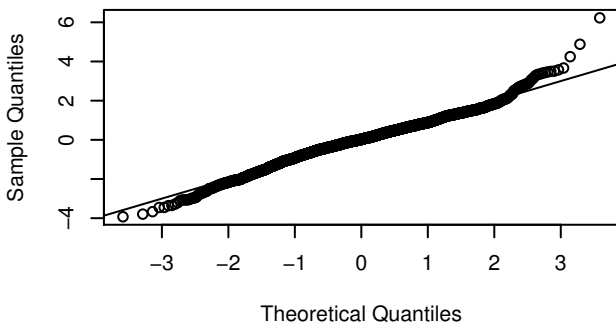

**Licor all – fil closed – narrow**

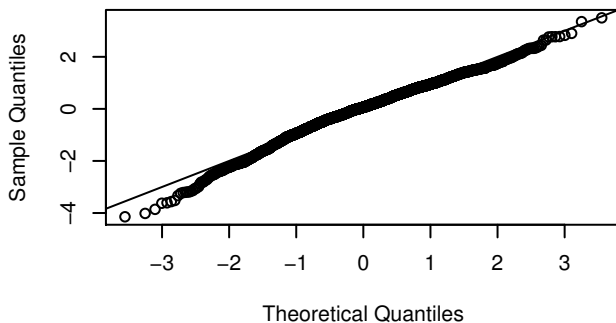

**Licor all – unfil closed – wide**

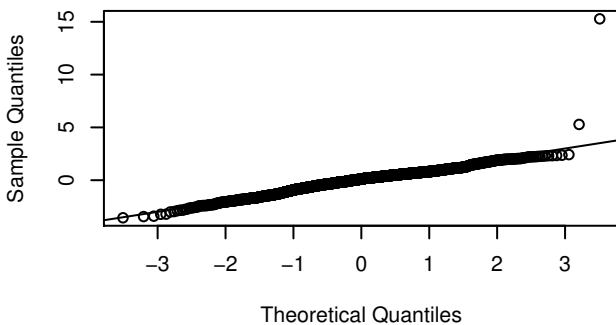

**Licor all – fil closed – wide**

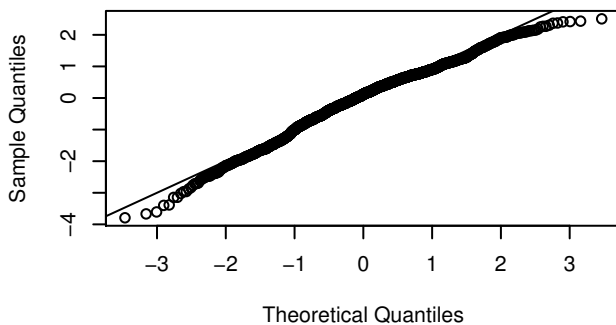

**AGPS all – unfil closed**

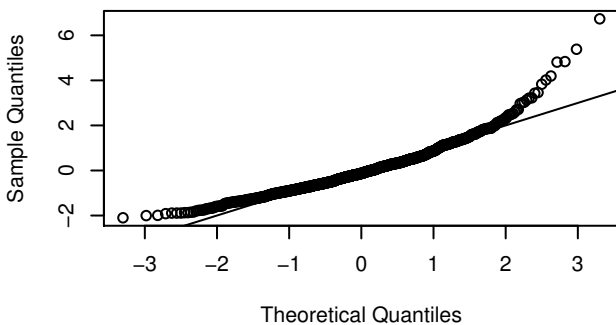

**AGPS all – fil closed**

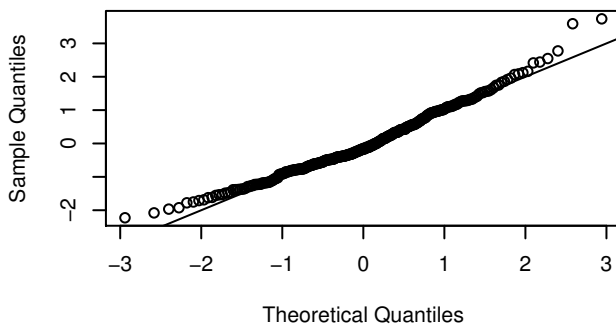

**Licor all – unfil closed – narrow**

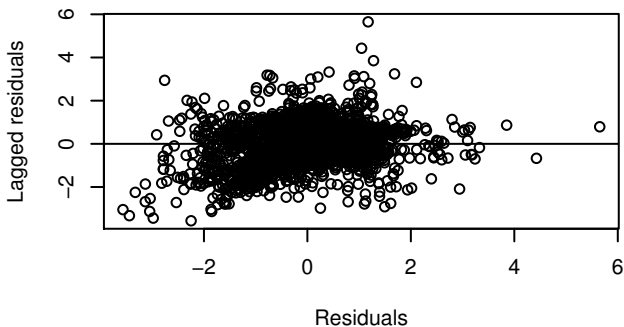

**Licor all – fil closed – narrow**

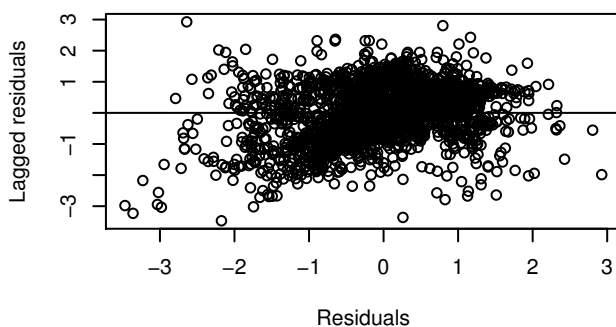

**Licor all – unfil closed – wide**

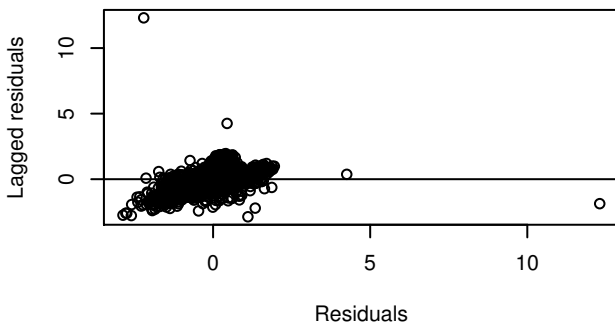

**Licor all – fil closed – wide**

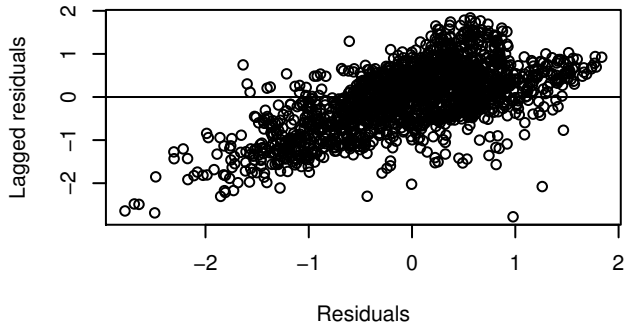

**AGPS all – unfil closed**

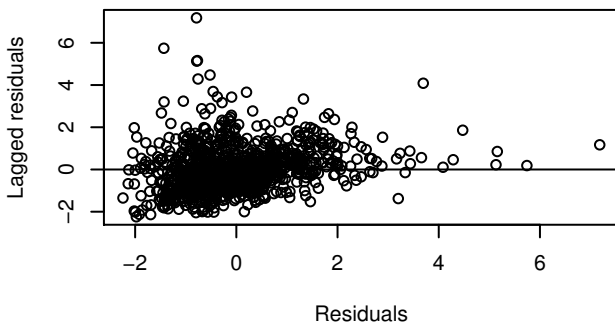

**AGPS all – fil closed**

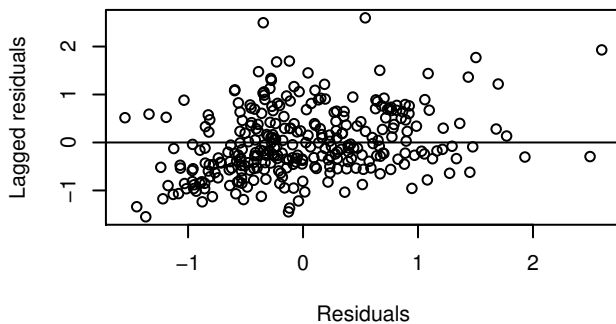

Supplement: Supplementary file 1 [file bg-13-1949-2016-supplement.pdf]
